# Supplementary material for: Hypoxia and ERα Transcriptional Crosstalk Is Associated with Endocrine Resistance in Breast Cancer
Source: MDPI journal article supplement (doi:10.3390/cancers14194934), 2022-10-08
Supplement: s1 [file s1]

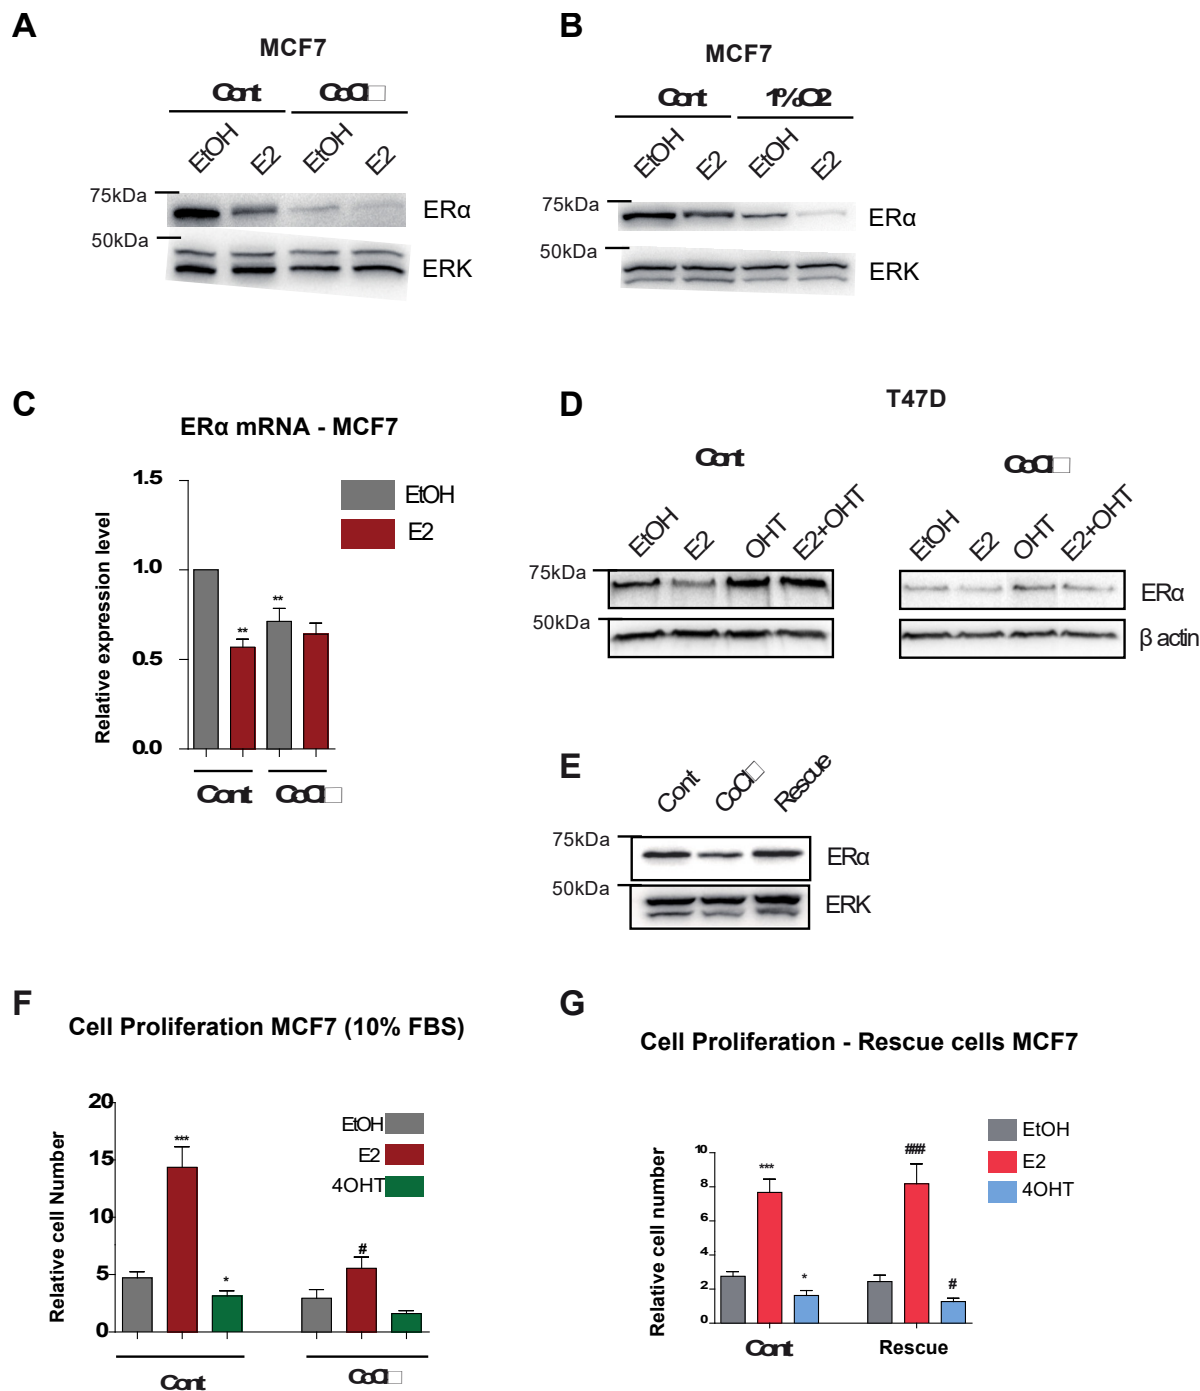

**Figure S1. ER protein/mRNA expression and MCF7 cells proliferation under hypoxia.** (A) Western-Blot showing ER protein expression level after 24 h of exposure to CoCl<sub>2</sub>, in presence or absence of 10 nM of E2 for 24 h. ERK1/2 was used as loading control. (B) Western-Blot showing ER protein expression level after 24h in presence of 1% O<sub>2</sub> atmosphere using H35 Hypoxystation (Don Whitley), in presence or absence of 10 nM of E2 for 24 h. ERK1/2 was used as loading control. (C) qPCR showing ER mRNA expression level after prolonged exposure to CoCl<sub>2</sub>, in presence or absence of 10 nM of E2 for 24 h. (D) Western-Blots showing ER protein expression in T47D treated or not with CoCl<sub>2</sub>, in presence or absence of 10 nM of E2 or 1 μM of 4-OHT for 24 h. -actin was used as loading control. (E) Western blot showing ER protein abundance in MCF7 control

cells, CoCl<sub>2</sub>-treated cells (1 month) and in cells hypoxic cells for which CoCl<sub>2</sub> was removed from the media for 1 month (Rescue). ERK was used as normalizing control. **(F)** Proliferation count under 10% FBS steroid free DMEM, of MCF7 treated for 6 days with EtOH or 10 nM E2 or 1  $\mu$ M 4-OHT. Values are expressed in fold change compared to the number of seeded cells at the beginning of the treatment. **(G)** Proliferation of control and rescue (1-month hypoxic stress followed by 1-month of recovery in CoCl<sub>2</sub> free medium) MCF7 treated for 6 days with EtOH, 10 nM E2 or 1  $\mu$ M 4-OHT, in presence of 2 % of steroid-free FBS. Values are expressed in fold change compared to the number of seeded cells at the beginning of the treatment. \*p-value < 0.05, \*\*p-value < 0.01 and \*\*\*p-value < 0.001 with a Mann-Whitney test for comparisons against the control. #p-value < 0.05 with a Mann-Whitney test for comparisons against CoCl<sub>2</sub> treatment.

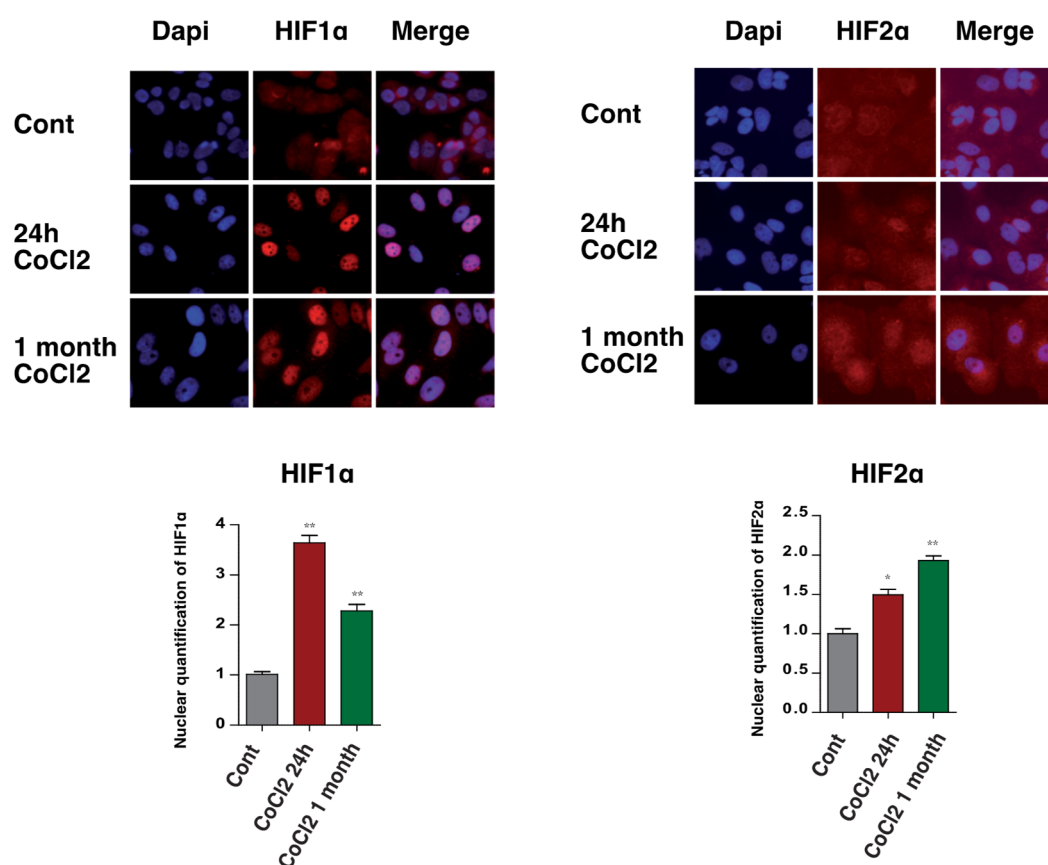

**Figure S2. HIF1 and HIF2 expression and localization in MCF7 cells after CoCl<sub>2</sub> treatment.** Immunofluorescence experiments showing HIF1 and HIF2 nuclear localization upon CoCl<sub>2</sub> exposure (24h or 1-month). Nuclear signal was quantified using Image J software. \*p-value < 0.05, \*\*p-value < 0.01 and \*\*\*p-value < 0.001 with a Mann-Whitney test for comparisons against the control.

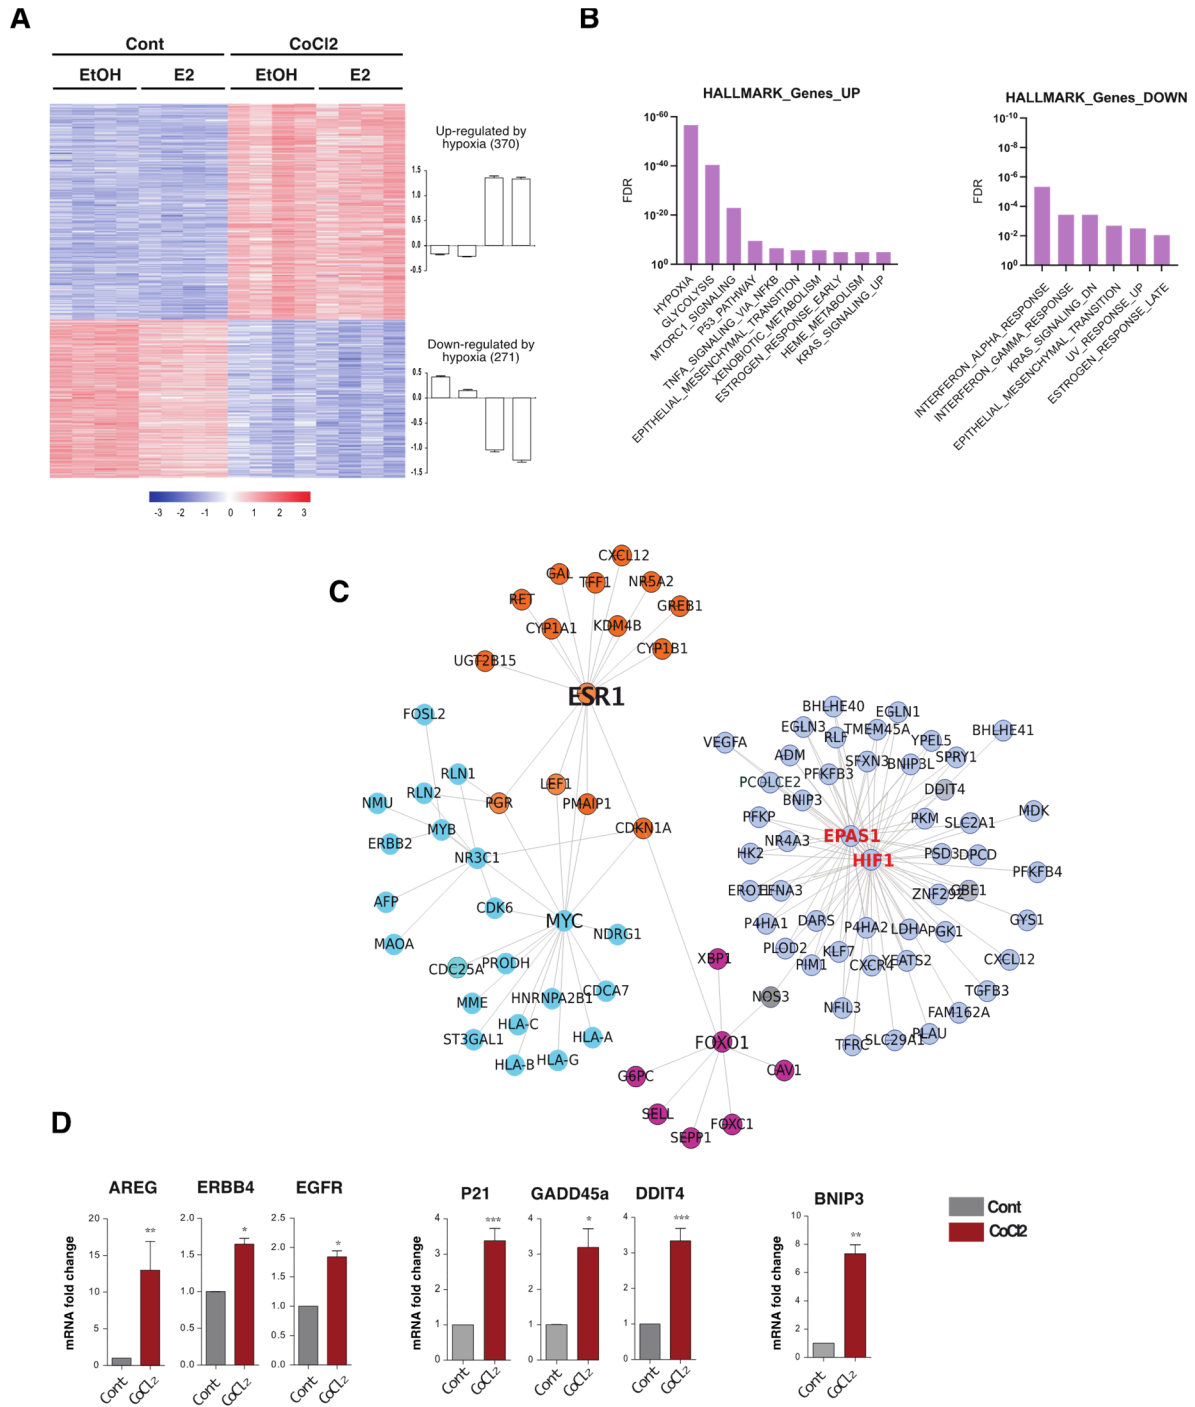

**Figure S3. Characterization of the hypoxia mimicking agent CoCl2 response on MCF7 cells.** (A) Differential expression analysis (FDR < 0.05 and FC > ±1.8) of hypoxia-regulated genes only. (B) Functional annotation of genes up and down regulated by CoCl2 treatment, using HALLMARK resources from GSEA (<https://www.gsea-msigdb.org/gsea/msigdb/>) (C) Transcriptional network built from transcript profiling data. Network was built using the AMEN software. HIF1 and HIF2 were added to network and used as central knots. (D) RT-qPCR experiments on hypoxia-regulated genes associated with endocrine resistance (*AREG*, *ERBB4*, *EGFR*), cell-cycle and cell-growth arrest (*P21*, *GADD45a*, *DDIT4*) and apoptosis (*BNIP3*). \*p-value < 0.05, \*\*p-value < 0.01 and \*\*\*p-value < 0.001 with a Mann-Whitney test for comparisons against control.

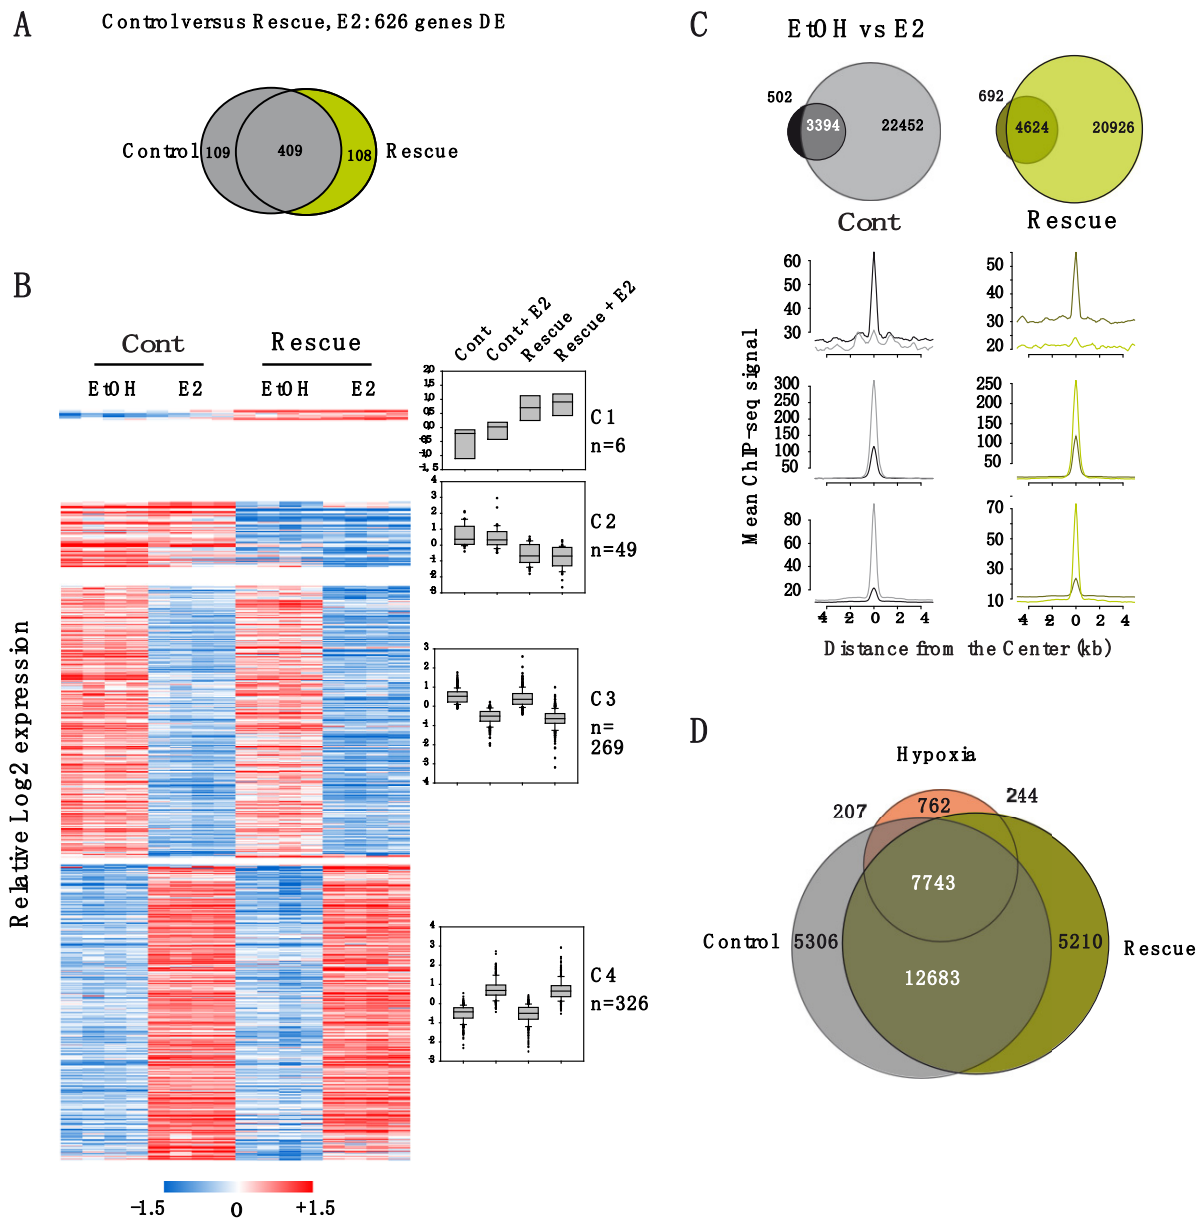

**Figure S4. Cessation of hypoxia restores E2-mediated transcription and ER binding to chromatin genome wide.** (A) & (B) Heatmap showing supervised clustering (k-means method) of total E2-regulated genes both in control and rescue (1-month hypoxic stress followed by 1-month of recovery in CoCl<sub>2</sub> free medium) MCF7 cells (FC > 1.8 – FDR < 0.05). Control and CoCl<sub>2</sub>-treated MCF7 cells were treated with EtOH or 10 nM of E2. Transcriptomes from four independent biological samples analyzed by microarray. Graphs on the left represent the average of expression value (Log<sub>2</sub>) of all genes of each cluster. The number of genes in each cluster are indicated. (C) Venn diagrams showing ERBSs overlapping in E2 or EtOH-treated cells for 50 minutes, either in control or rescue MCF7 cells, as determined from ChIP-seq experiments. The ER ChIP-seq signals were aligned and averaged within a -2/+2 kbp window centered on ERBS belonging to the 3 categories in the upper Venn diagrams. (D) Venn diagram showing ERBSs overlapping between control, CoCl<sub>2</sub>-treated and rescued cells. All ERBSs detected in absence or presence of E2 were included in the analysis.

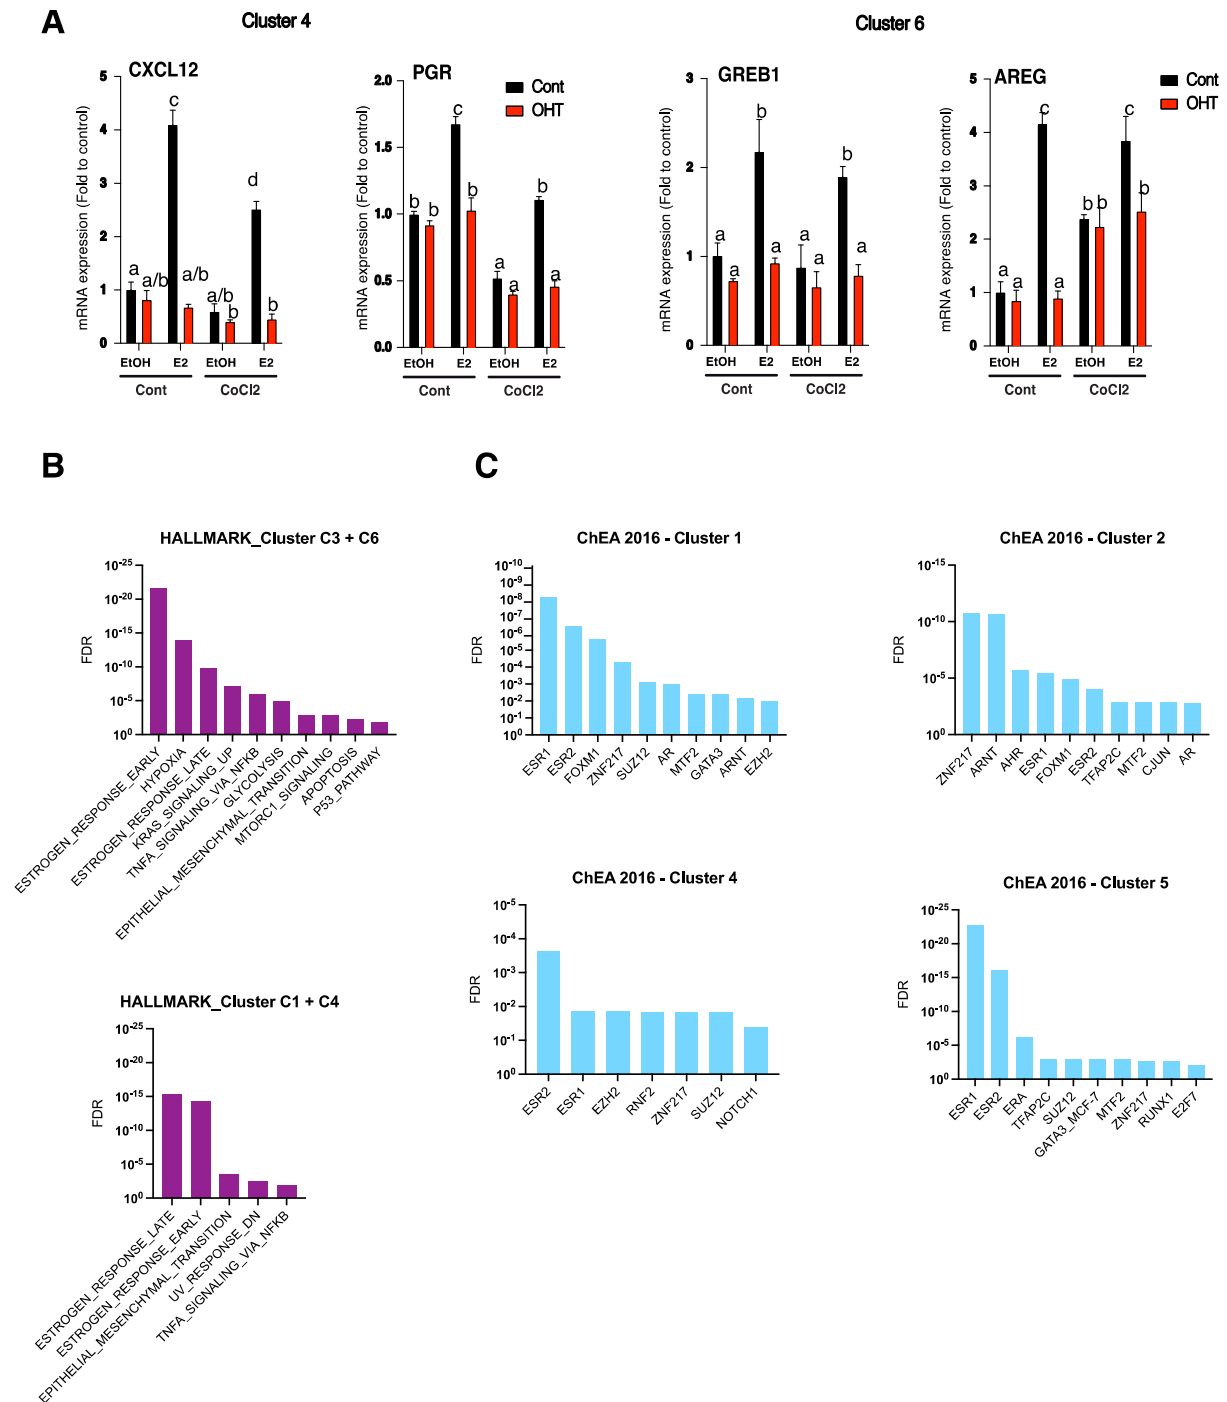

**Figure S5. Effects of hypoxia on E2-response in T47D cell line and micro-array clusters functional annotation. (A)** RT-qPCR showing *CXCL12*, *PGR*, *GREB1* and *AREG* expression level after 24 h exposure to CoCl<sub>2</sub>, in presence or absence of 10 nM of E2 and/or 1  $\mu$ M 4-OHT for 24 h. Values represent the mean  $\pm$  SD of triplicate and are expressed as a fold induction above the value of untreated cells. (\* $p < 0.05$ , student's t-test). **(B)** Functional annotation of genes belonging to clusters 3 and 6 together (E2 dependent – upregulated by CoCl<sub>2</sub>), and to clusters 1 and 4 together (E2 dependent – downregulated by CoCl<sub>2</sub>), using HALLMARK resources from GSEA (<https://www.gsea-msigdb.org/gsea/msigdb/>) **(C)** Analysis of transcription factors binding enrichment using ChEA algorithm on genes belonging to the clusters 1, 2, 4 and 5.

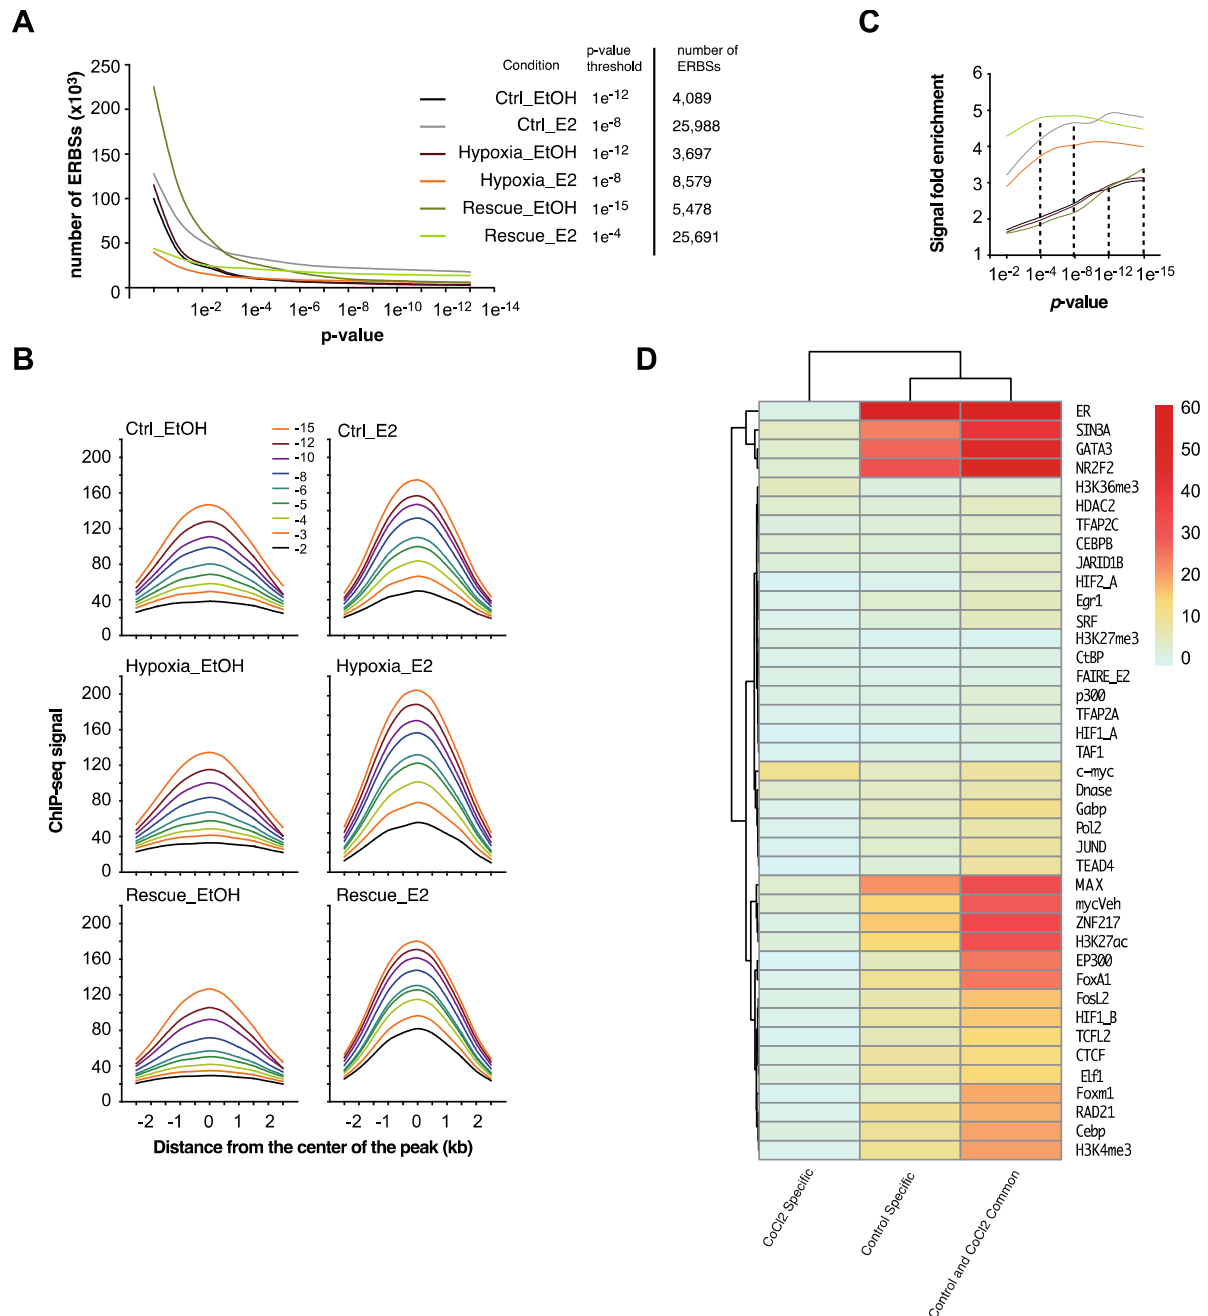

**Figure S6. Determination of specific ER cistromes and transcription factor motif analysis.** (A) We identified ER enriched regions (ERBSs) in MCF-7 cells treated or not with E2 for 50 min in presence or absence hypoxia mimetic agent CoCl<sub>2</sub>, using different thresholds of significance and peaks defined as being constituted of at least 4 adjacent signals within 65 bp above the threshold values. The number of ERBSs identified is shown here as a function of the p-value used. The table on the right side of the panel indicates the number of ERBSs at the chosen p-value found to have to best signal to noise ratio. (B) Each graph represents the mean ChIP-seq signal observed on the different sets of ERBSs determined in Panel A in a -2.5/+2.5 kb window centered at each ERBS summit. (C) The mean signal determined on all sets of ERBSs identified at each p-values was normalized to background signals measured at -5kb from the center of each ERBS. These normalized values indicate the mean fold enrichment of identified ERBSs in ER. We determined the best p-value threshold indicated in Panel A for discriminating the signal-to-noise within ERBSs as the one determining the plateau of these curves, as illustrated by the dotted line. (D) Hierarchical clustering of the percentage of overlap of ER

cistromes in control and CoCl<sub>2</sub> treated cells with the binding sites of other transcription factors or enriched regions of histones marks previously determined in MCF7 cells. Analysis was made on CoCl<sub>2</sub> specific ERBSs, control specific ERBSs and common ERBSs. References of published CHIP-Seq data are listed in supplementary table 3.

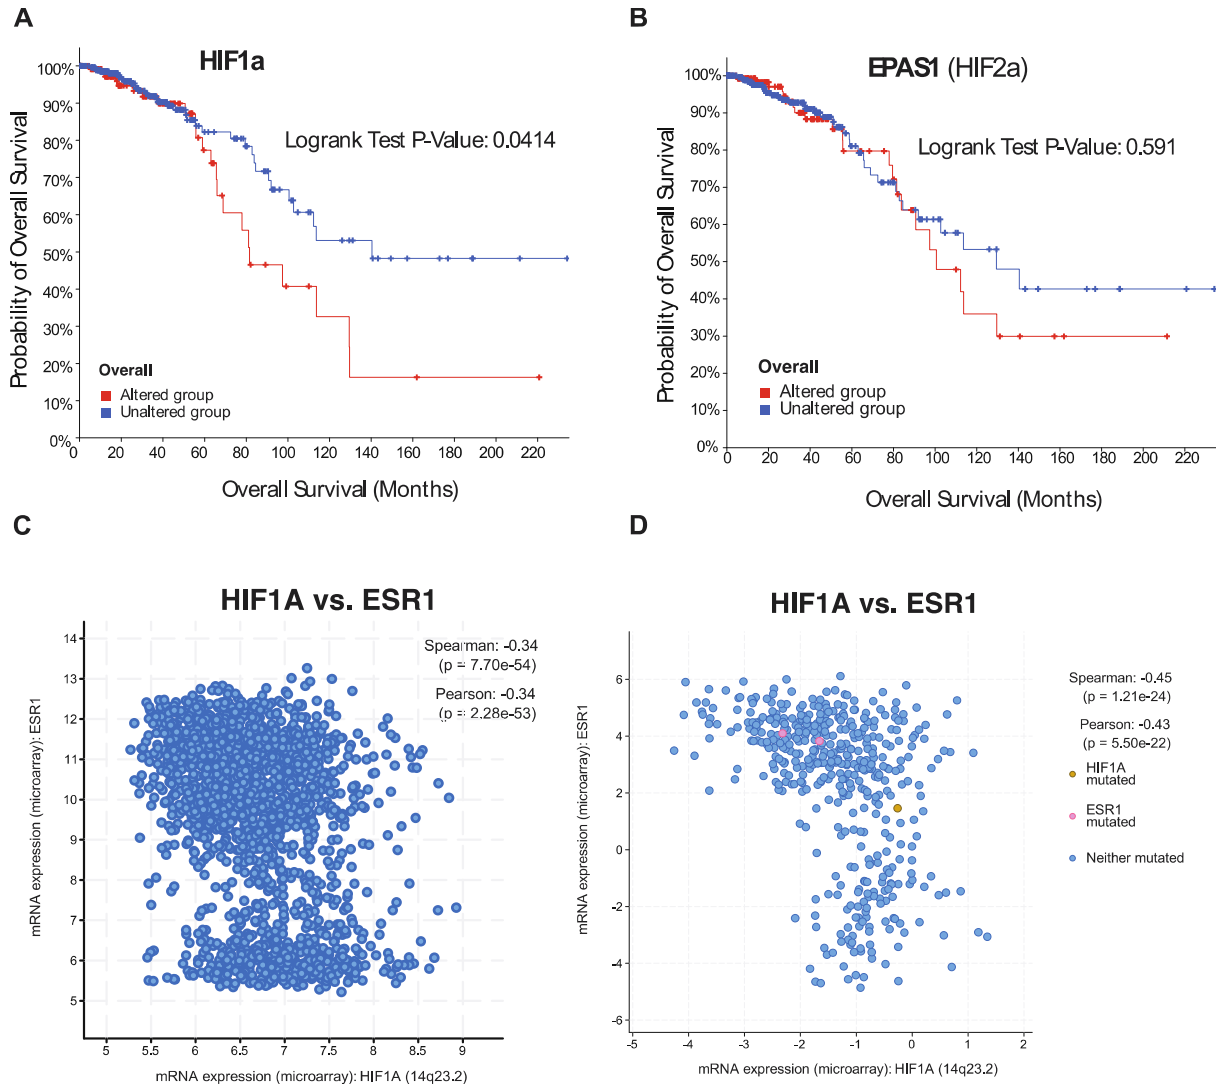

**Figure S7. HIF1 and HIF2 clinical data and correlation with *ESR1*.** (A) & (B) HIF1 and HIF2 mRNA expression prediction value regarding overall survival (OS) in TCGA cohort (z-score = 1, n = 463). (C) & (D) *HIF1a* and *ESR1* mRNA expression anti correlation in the Metabric (n = 1980) and TCGA (n = 460) cohorts, respectively. Spearman and Pearson correlation values and p-value are shown.



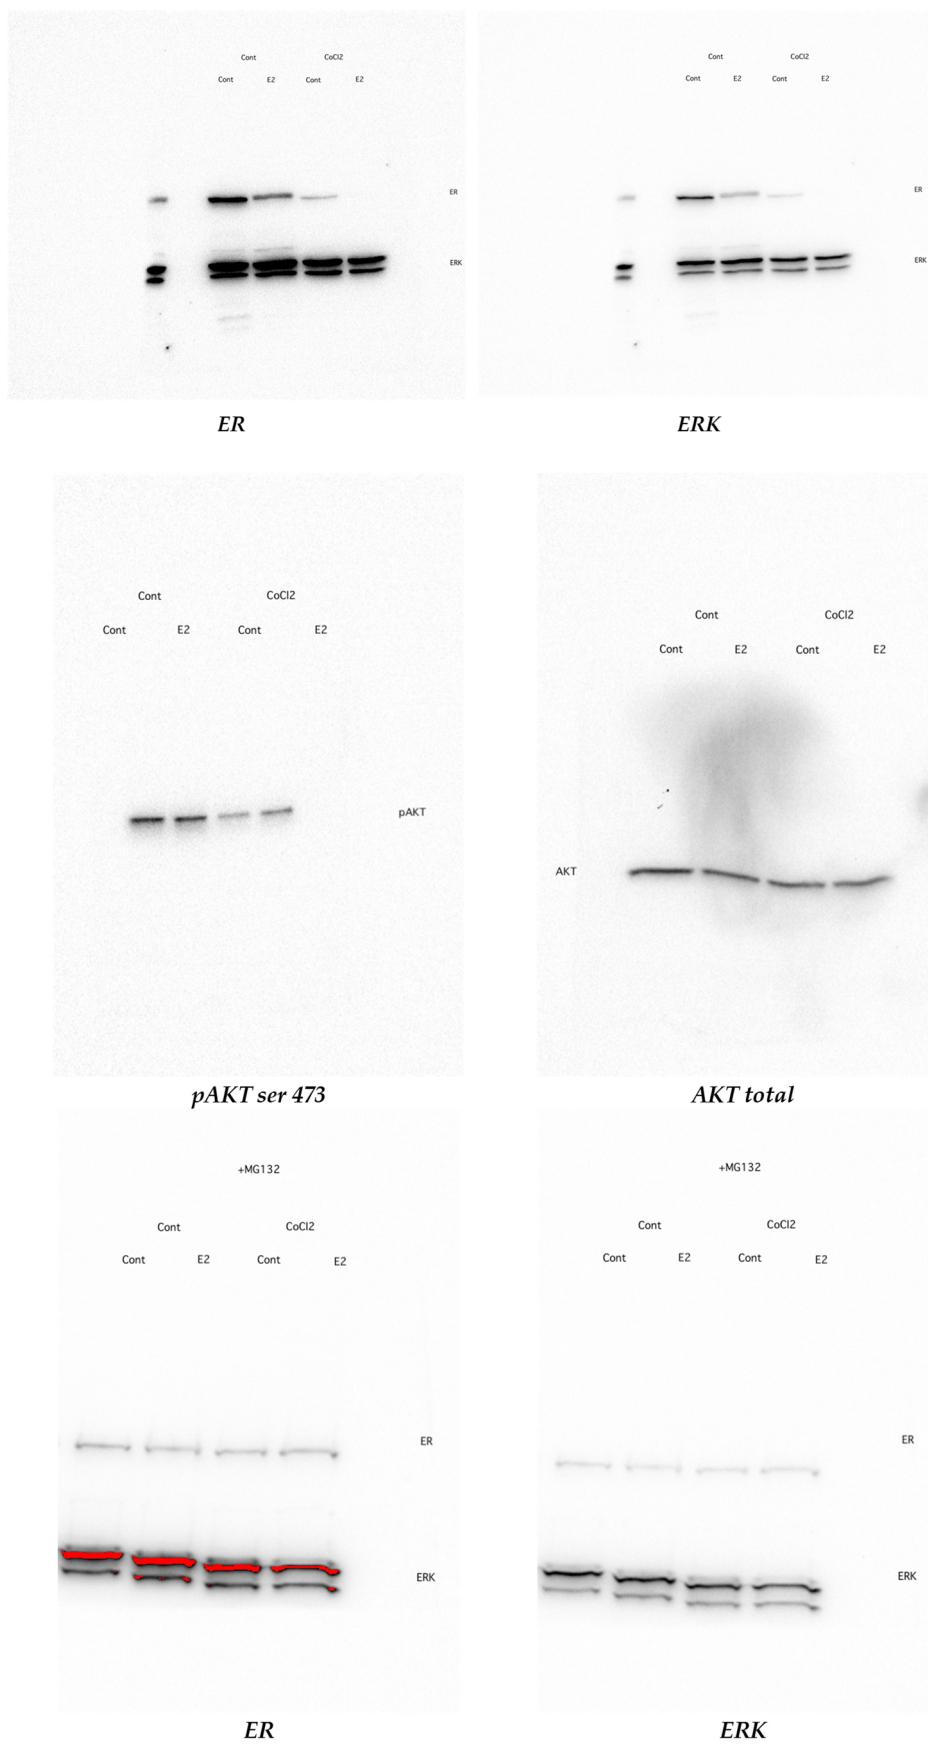

**Figure S8. The original western blot figure of figure 1A.**



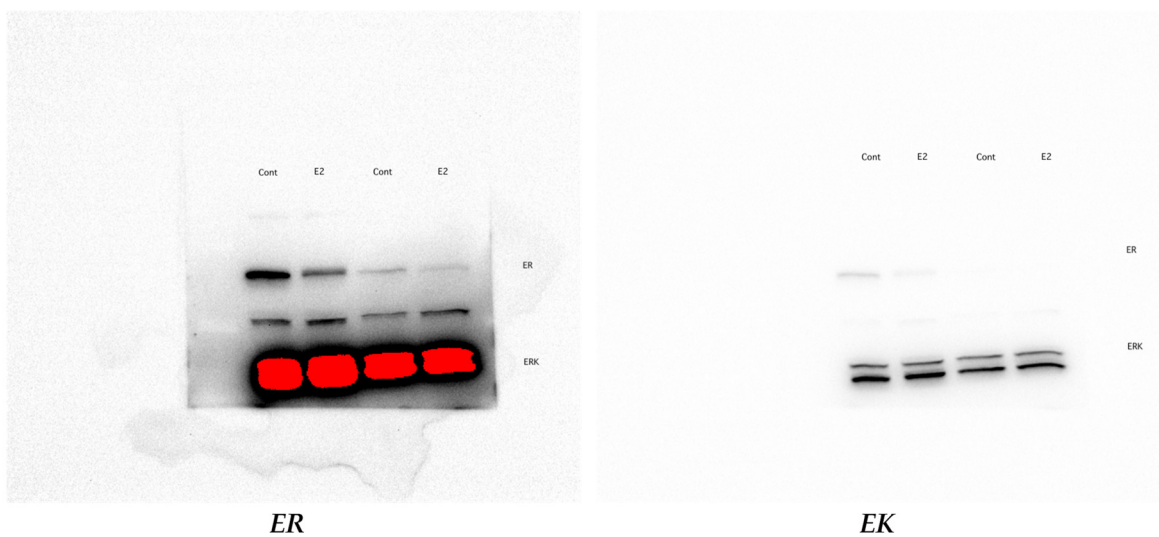

Figure S9. The original western blot figure of figure S1A.

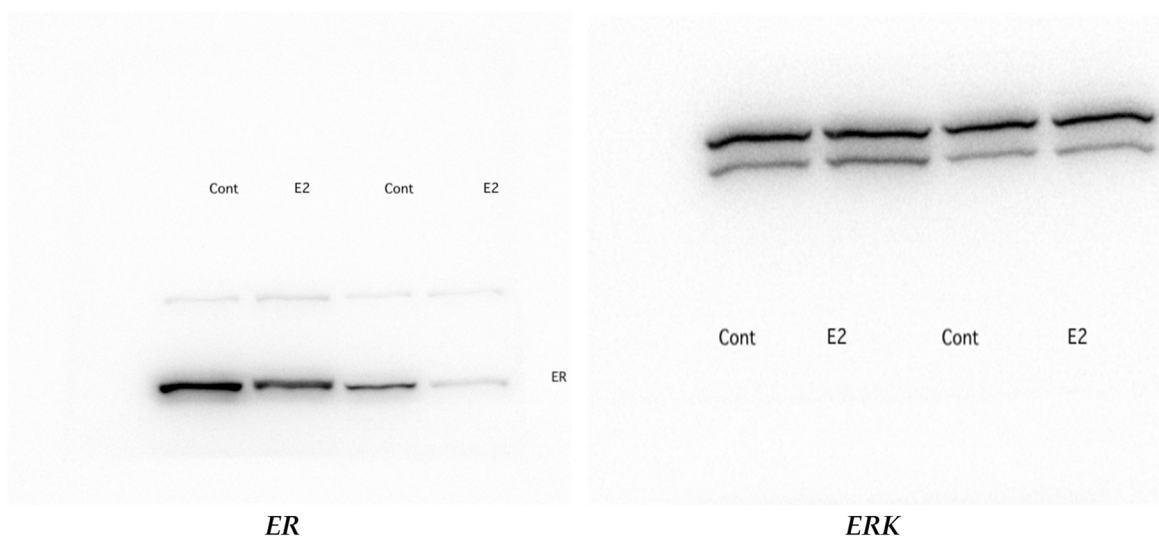

Figure S10. The original western blot figure of figure S1B.

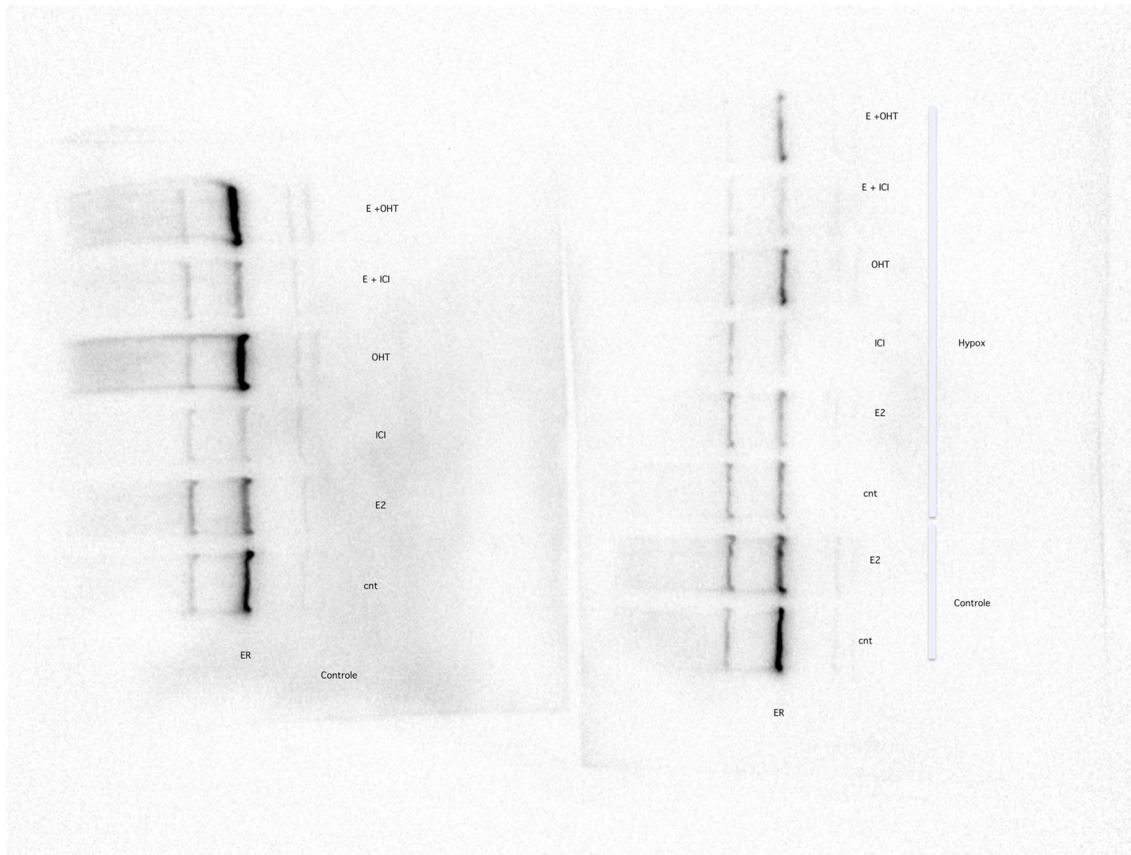

*ER*

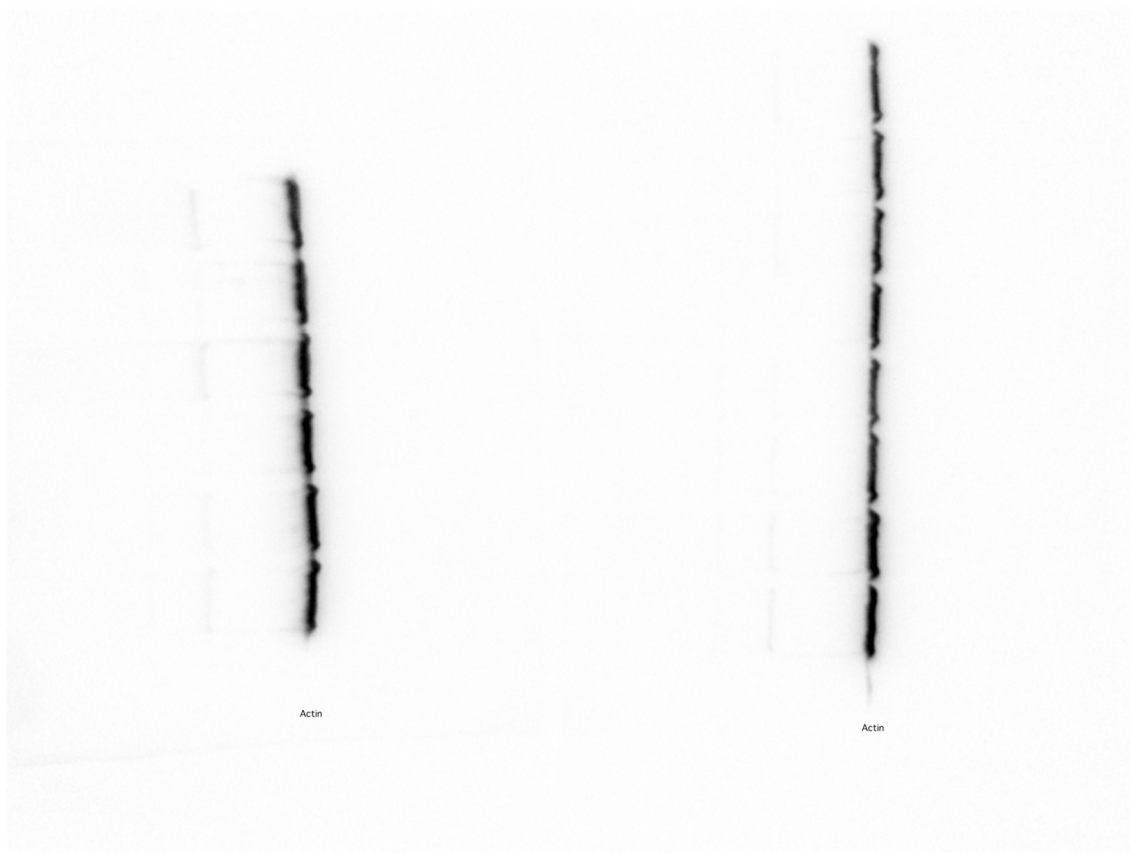

*Actin*

**Figure S11. The original western blot figure of figure S1D.**

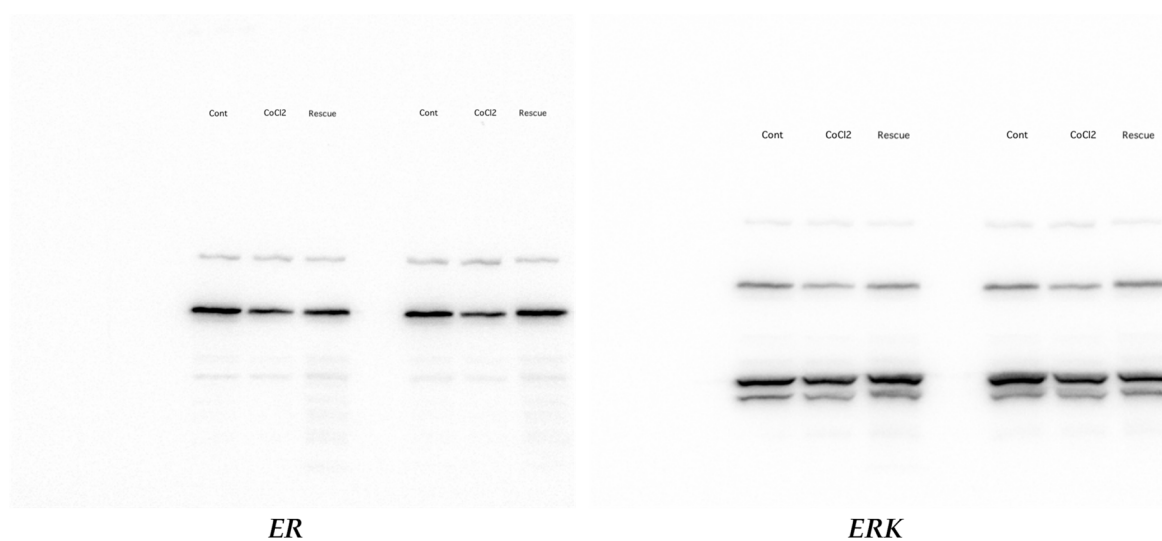

**Figure S12. The original western blot figure of figure S1E.**

**Table S1. List of primers used in qPCR to quantify mRNA expression and CHIP.**

| RT-qPCR                  | Forward                   | Reverse                  |
|--------------------------|---------------------------|--------------------------|
| SGK1                     | GACAGGACTGTGGACTGGTG      | TTTCAGCTGTGTTTCGGCTA     |
| AREG                     | GTATTTTCACTTTCCGTCTTG     | CCTGGGTATATTGTCGATTCA    |
| CXCL12                   | CTCCTGGGGATGTGTAATGG      | GCCTCCATGGCATACATAGG     |
| TFF1                     | ACCATGGAGAACAAGGTGA       | CCGAGCTCTGGGACTAATCA     |
| PGR                      | GTGCCTATCCTGCCTCTCAATC    | CCCGCCGTCGTAACTTTCG      |
| GREB1                    | GAGGATGTGGAGTGGAGACC      | CAGTACCTCAAAGACCTCGGC    |
| TBP                      | AGGCAAGGGTACATGAGAGCCA    | TGGCTCTCATGTACCCTTGCT    |
| DDIT4                    | AGGAAGCTCATTGAGTTGTG      | GGTACATGCTACACACACAT     |
| ER $\alpha$              | AGTCACAATGAACCTGCAAGC     | GGCCAGGTCATTCTCCACATT    |
| HCK                      | CTGCCAACATCTTGGTCTCT      | TCAGCAGGATACCAAAGGAC     |
| CDC25a                   | CAAACCTTGACAACCGATGC      | AACTGACCGAGTGCTGGAG      |
| p21                      | TGTGGACCTGTCACTGTCTTG     | TAGGGCTTCTCTTGGAGAA      |
| KDM4b                    | GACATCAGCGGCTCTTTGTATGATG | ATGCCGAAGTACAGGTAGGGCGTG |
| BNIP3                    | CAGGGCTCCTGGGTAGAACT      | CTACTCCGTCCAGACTCATGC    |
| EGFR                     | GTGACCGTTTGGGAGTTGATGA    | GGCTGACGGAGGCGTTCTC      |
| HIF1A                    | TCCAAGAAGCCCTAACGTGT      | TGATCGTCTGGCTGCTGTAA     |
| HIF2A                    | ACACACAAGCTCCTCTCCTC      | AGCTCCACCTGTGTAAGTCC     |
| <b>CHIP-qPCR</b>         |                           |                          |
| FOXC1                    | GCTGGTGGCACTCAGAAAGT      | CCCTCCTTTGACAGGAAGAA     |
| AREG                     | AGCTAGAAGCGTTTGCAGGA      | TGGGTGTGTGTTTGTCCACT     |
| CXCL12 ERE1              | TGCTCCGCTAAGGTTTCAGT      | GCACCTAGTCACACCCACCT     |
| NTN1                     | GAACAAGGATGGAGGGTGAA      | CCCCCTACAAGGCAAGATG      |
| GREB1                    | GCACACTTTCCACCTCTGCT      | GCTCGTTGCAAAGTCAAAT      |
| TFF1                     | GTCGCACTTCTCGAAGGTCT      | CAGGTAAGGCGTGCTTCTTC     |
| FOX20 (internal control) | TTTGCTTTATTTGGCGCTTT      | TGAGCGATTGCAAAGAGATG     |
| HCK                      | GTAGGTGCCTGTGACCCTGT      | TACTTCAGCCTCTGGCTGGT     |

|                      |                      |                       |
|----------------------|----------------------|-----------------------|
| KDM4B                | TCTGATTGGACACCTGGCAG | GCTTCCACCAAAACAGCCTG  |
| CDC25a               | AGGCCTGAGAGATGGGAAGA | ACGGGTCATGCTGTTGTCTC  |
| PGR                  | GCAGGACGACTTCTCAGACC | GCCTGACCTGTTGCTTCAAT  |
| SGK1                 | GTTCTGTCCCCATTGAGAGG | GGAGCCGATGGAGACTGATA  |
| CoCl2 specific ERBS1 | GGCTATCTTGACAGCGGGTC | TGGCAGGAAGCGAATTAGTCA |
| CoCl2 specific ERBS2 | CCTCCGCCCTATGGGAAAAA | ATGTCGCTATGTGTTCTGGGA |

Table S2. ChIP-sequencing statistics.

| Sample            | Type    | Raw reads   | Aligned reads | Unique positions | Normalization coefficient |
|-------------------|---------|-------------|---------------|------------------|---------------------------|
| MCF7 Control EtOH | Input   | 136,024,634 | 107,011,244   | 93,736,338       | NA                        |
| MCF7 Control E2   | Input   | 114,985,595 | 91,151,438    | 80,379,555       | NA                        |
| MCF7 Hypoxia EtOH | Input   | 126,035,952 | 96,026,526    | 83,989,729       | NA                        |
| MCF7 Hypoxia E2   | Input   | 127,009,747 | 92,622,859    | 81,203,292       | NA                        |
| MCF7 Rescue EtOH  | Input   | 101,653,620 | 75,140,544    | 66,405,889       | NA                        |
| MCF7 Rescue E2    | Input   | 108,506,834 | 85,577,616    | 76,349,649       | NA                        |
| MCF7 Control EtOH | ChIP ER | 103,630,263 | 75,206,331    | 52,480,373       | 1.65                      |
| MCF7 Control E2   | ChIP ER | 156,709,777 | 123,215,788   | 83,214,383       | 1                         |
| MCF7 Hypoxia EtOH | ChIP ER | 121,701,565 | 90,327,227    | 62,349,497       | 1.37                      |
| MCF7 Hypoxia E2   | ChIP ER | 90,330,137  | 62,648,747    | 39,791,861       | 1.98                      |
| MCF7 Rescue EtOH  | ChIP ER | 153,687,583 | 122,234,881   | 89,295,787       | 1.01                      |
| MCF7 Rescue E2    | ChIP ER | 119,442,446 | 90,309,476    | 65,287,259       | 1.36                      |

Supplementary Table S3. Public dataset used.

| Cell line | Target   | (Dataset)    | Transcription Factors              |  |
|-----------|----------|--------------|------------------------------------|--|
|           |          |              | Reference                          |  |
| MCF-7     | ESR1     | /            | Odom et al, 2010                   |  |
|           | FoxA1_1  | 6566         | Hurtado A, et al. Nat. Genet. 2011 |  |
|           | FoxA1_2  | 6567         | Hurtado A, et al. Nat. Genet. 2011 |  |
|           | Dnase_1  | 45031        | Maurano MT, et al. Science 2012    |  |
|           | Dnase_2  | 45032        | Maurano MT, et al. Science 2012    |  |
|           | MAX      | 46324        | Gertz J, et al.. Mol. Cell 2013    |  |
|           | GABPA    | 46314        | Gertz J, et al.. Mol. Cell 2013    |  |
|           | REST     | 46313        | Gertz J, et al.. Mol. Cell 2013    |  |
|           | SRF      | 46312        | Gertz J, et al.. Mol. Cell 2013    |  |
|           | TAF1     | 46320        | Gertz J, et al.. Mol. Cell 2013    |  |
|           | H3K4me3  | UCSC dataset | Encode data                        |  |
|           | H3K27ac  | UCSC dataset | Encode data                        |  |
|           | H3K27me3 | UCSC dataset | Encode data                        |  |
|           | H3K36me3 | UCSC dataset | Encode data                        |  |
|           | SIN3A    | UCSC dataset | Encode data                        |  |
|           | RAD21    | UCSC dataset | Encode data                        |  |
|           | PML      | UCSC dataset | Encode data                        |  |
|           | EP300    | UCSC dataset | Encode data                        |  |
|           | MAX      | UCSC dataset | Encode data                        |  |
|           | JUND     | UCSC dataset | Encode data                        |  |
|           | HDAC2    | UCSC dataset | Encode data                        |  |
|           | GATA3    | UCSC dataset | Encode data                        |  |
|           | Gabp     | UCSC dataset | Encode data                        |  |
|           | Foxm1    | UCSC dataset | Encode data                        |  |
|           | FosL2    | UCSC dataset | Encode data                        |  |
|           | Elf1     | UCSC dataset | Encode data                        |  |
|           | Egr1     | UCSC dataset | Encode data                        |  |
|           | Cebp     | UCSC dataset | Encode data                        |  |
|           | ZNF217   | UCSC dataset | Encode data                        |  |
|           | TCFL2    | UCSC dataset | Encode data                        |  |
|           | CTCF     | UCSC dataset | Encode data                        |  |

---

---

TEAD4

UCSC dataset

Encode data

---
